# Supplementary material for: An Integrative Transcriptomic and Methylation Approach for Identifying Differentially Expressed Circular RNAs Associated with DNA Methylation Change
Source: MDPI journal article supplement (doi:10.3390/biomedicines9060657), 2021-06-08

Term

small GTPase binding

regulation of insulin receptor signaling pathway

regulation of cellular response to insulin stimulus

Ras GTPase binding

nucleoplasm part

nuclear body

intracellular receptor signaling pathway

GTPase binding

Golgi vesicle transport

Count

10

20

30

EnrichmentRatio

8

6

4

2

$-\log_{10}(\text{p-value})$

| Term                                                | $-\log_{10}(\text{p-value})$ | Count | EnrichmentRatio |
|-----------------------------------------------------|------------------------------|-------|-----------------|
| small GTPase binding                                | 4.9                          | 10    | 2.5             |
| regulation of insulin receptor signaling pathway    | 5.2                          | 10    | 7.5             |
| regulation of cellular response to insulin stimulus | 5.0                          | 10    | 6.5             |
| Ras GTPase binding                                  | 5.1                          | 20    | 2.5             |
| nucleoplasm part                                    | 5.2                          | 30    | 2.5             |
| nuclear body                                        | 4.9                          | 20    | 2.5             |
| intracellular receptor signaling pathway            | 4.8                          | 10    | 4.5             |
| GTPase binding                                      | 4.7                          | 20    | 2.5             |
| Golgi vesicle transport                             | 5.7                          | 10    | 4.5             |

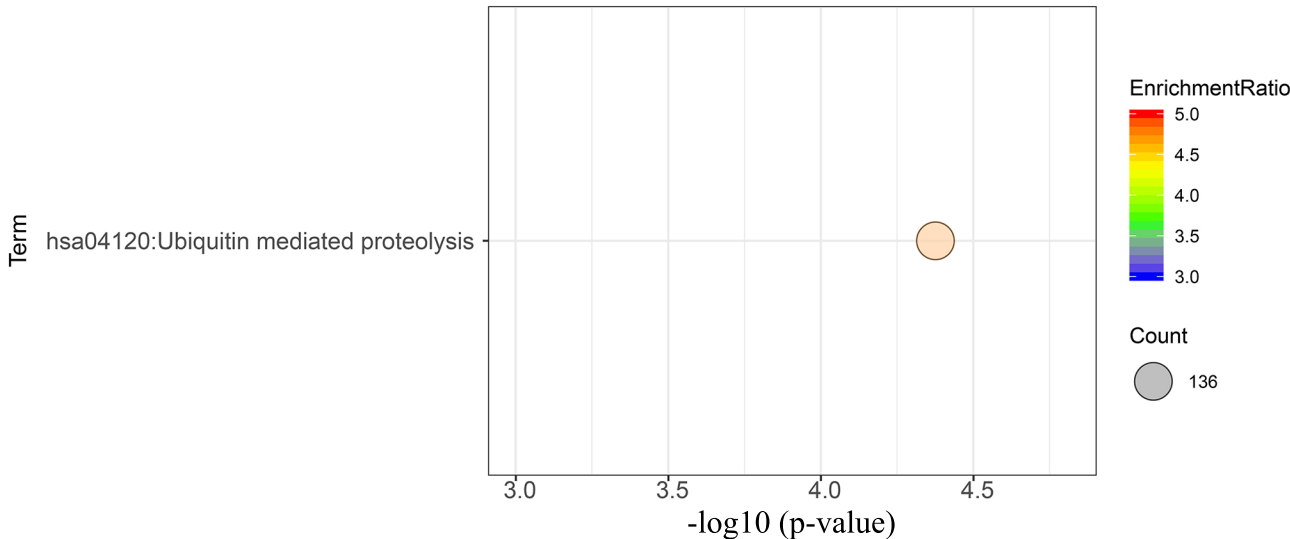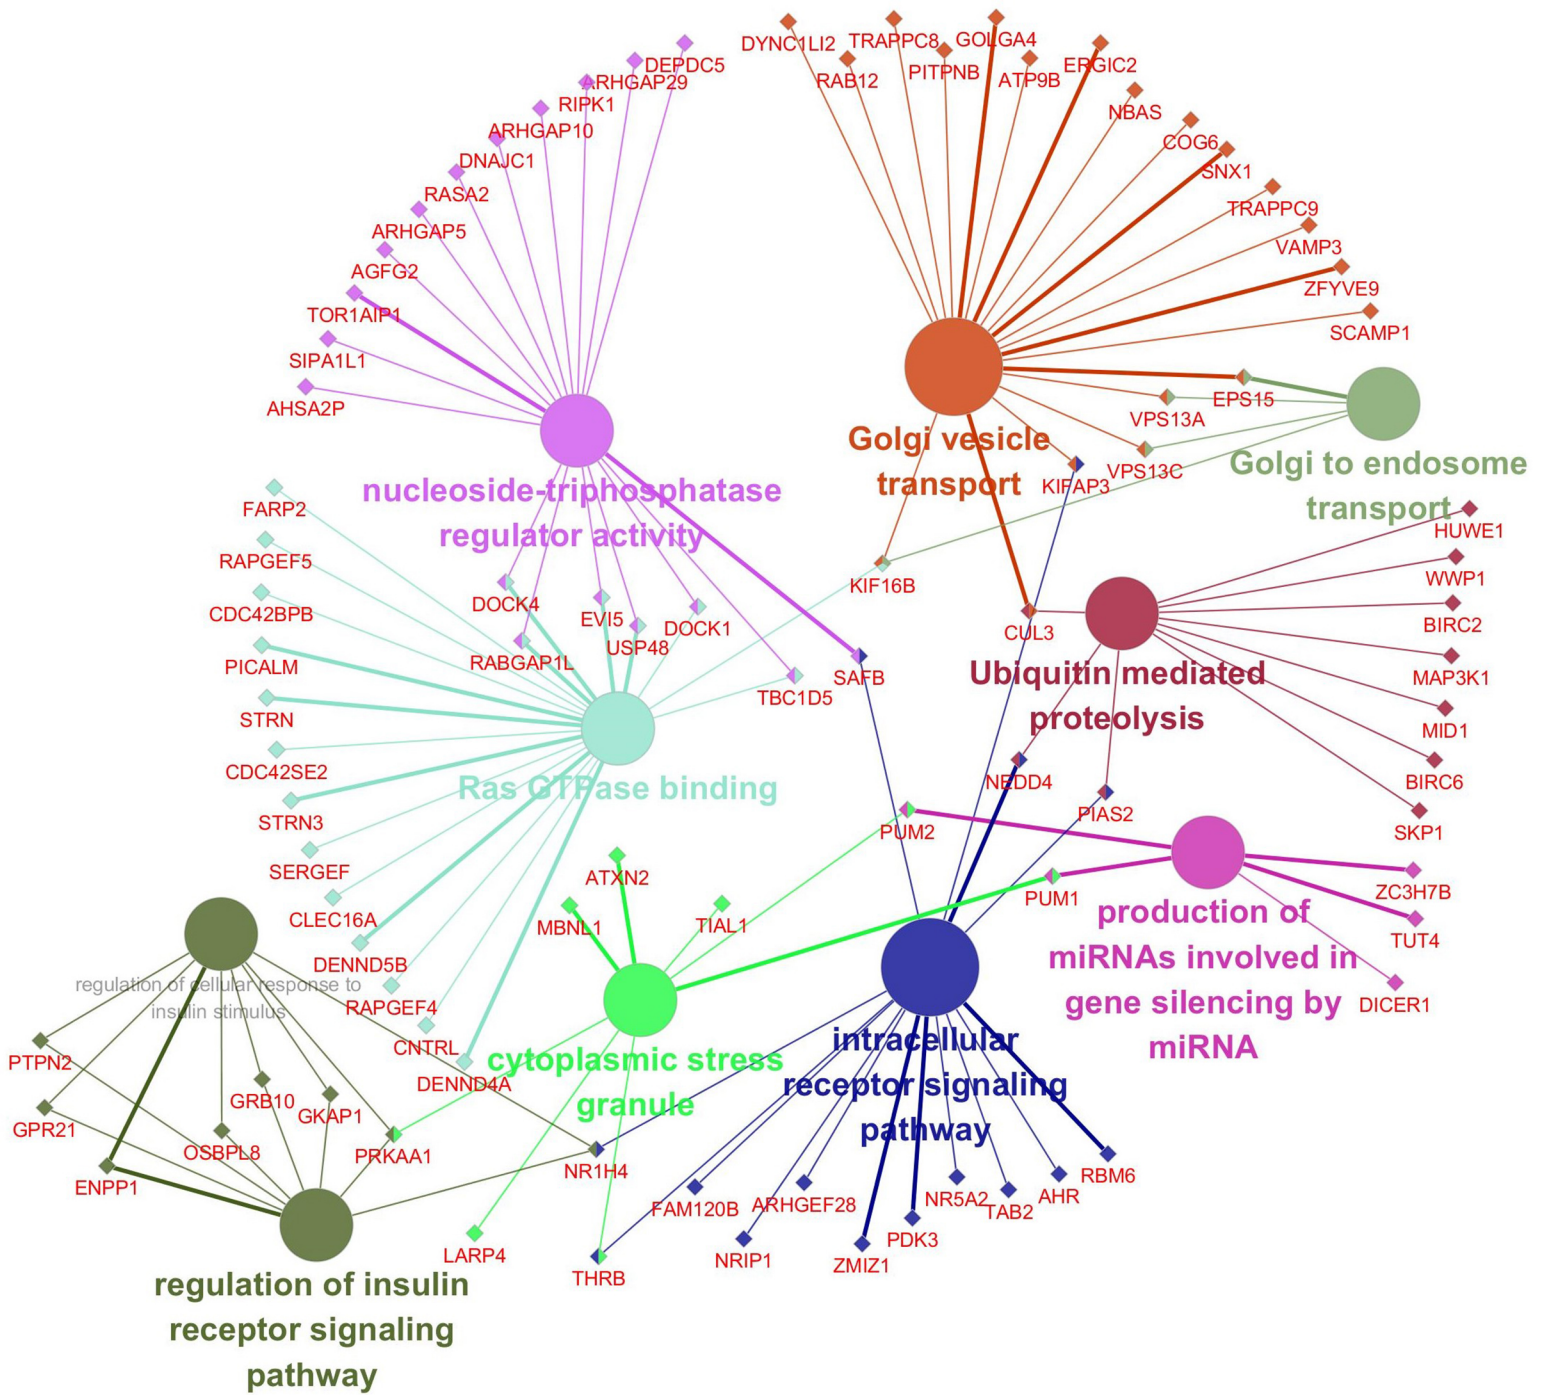

Supplement: s1 [file s1]
