# Supplementary figures and images for: An Integrative Transcriptomic and Methylation Approach for Identifying Differentially Expressed Circular RNAs Associated with DNA Methylation Change
Source: MDPI journal article supplement (doi:10.3390/biomedicines9060657), 2021-06-08

Supplemental Figure S1

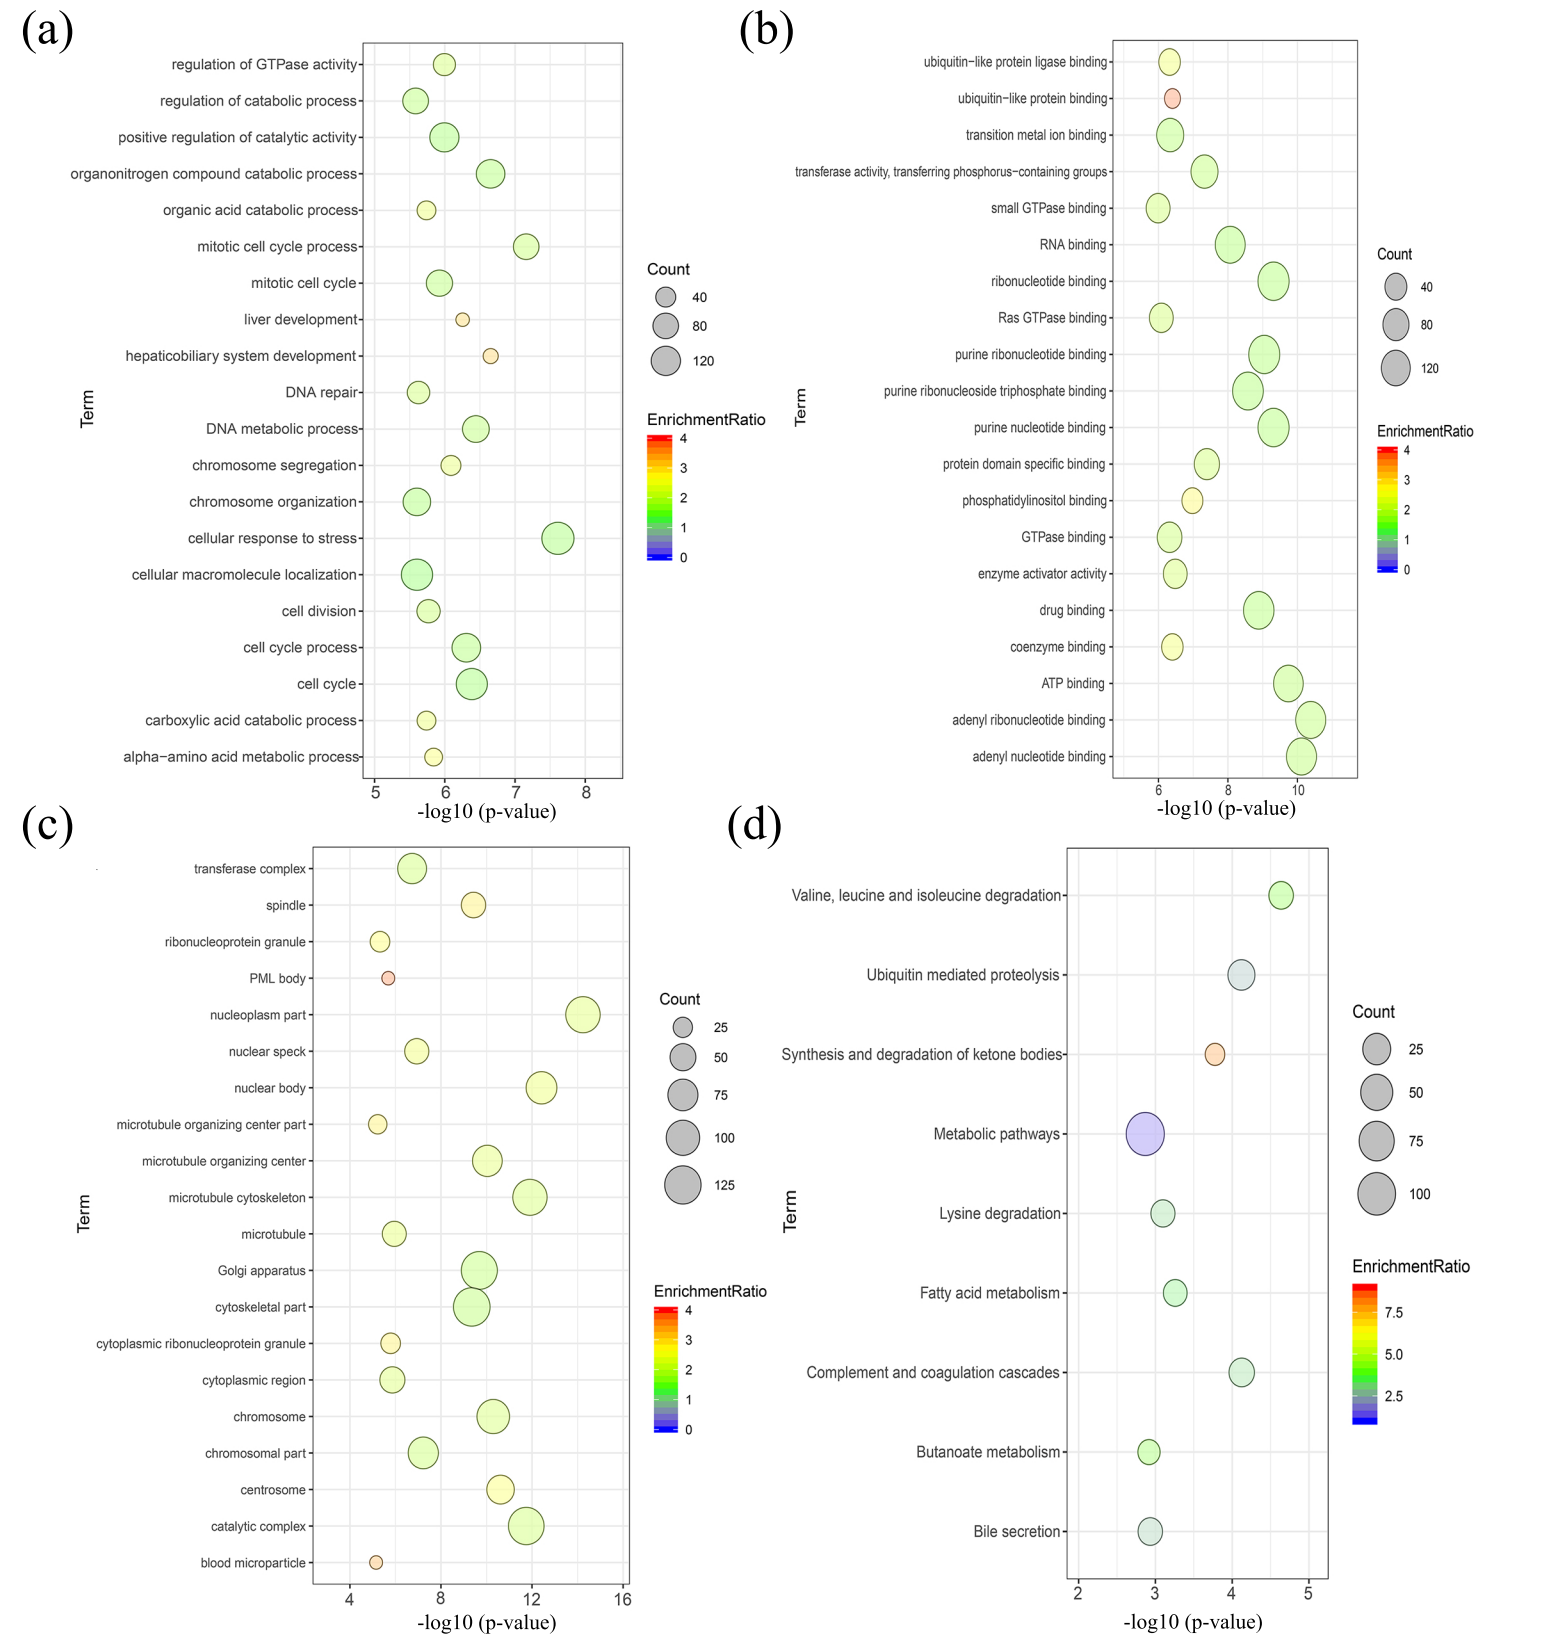

Supplement: s1 [file s1]

Supplemental Figure S3

Tumor vs. Normal

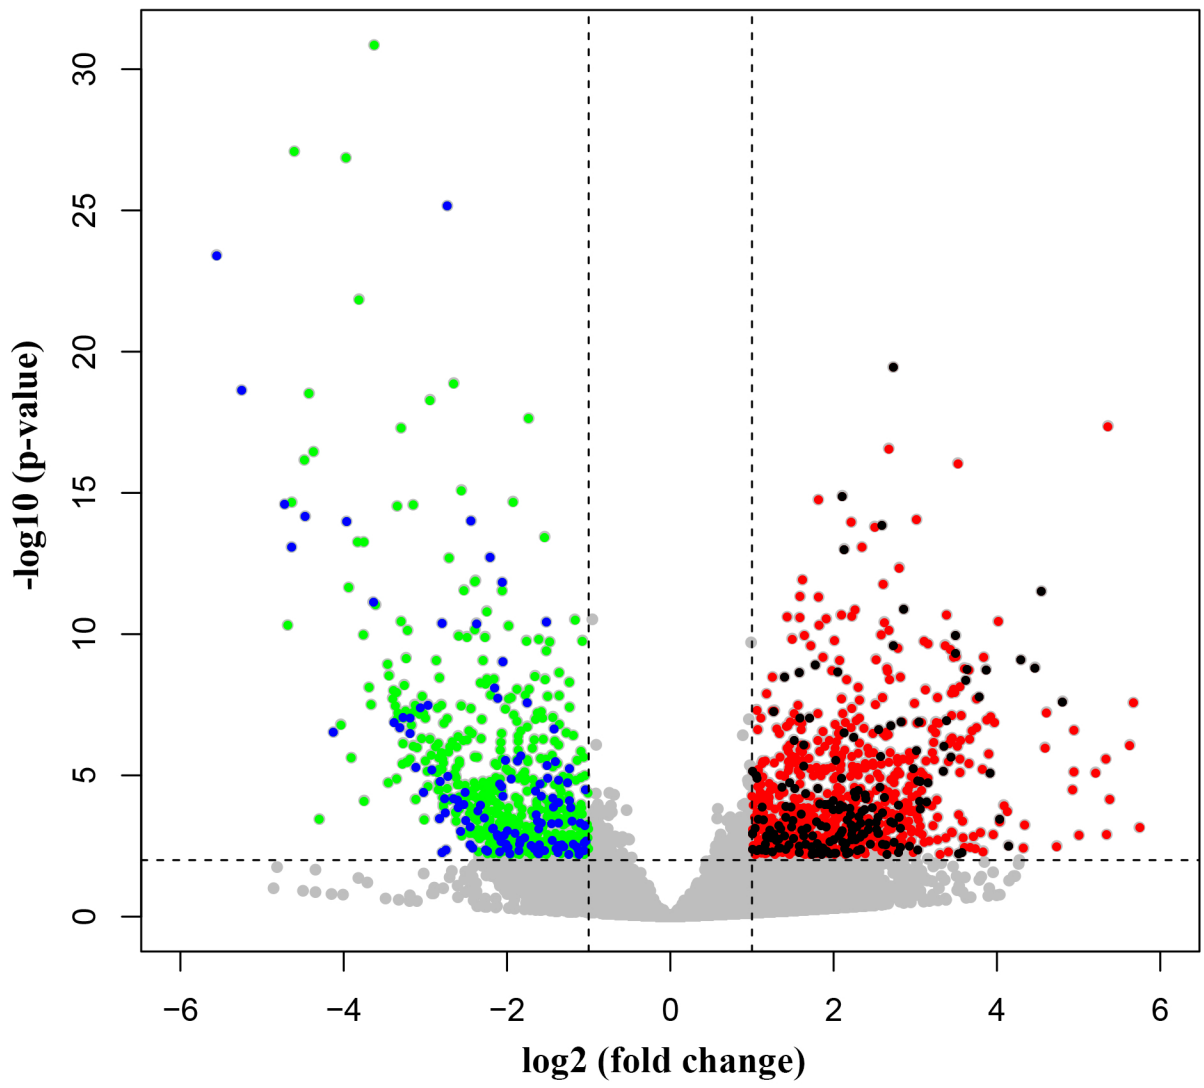

Supplement: s1 [file s1]

Supplemental Figure S4

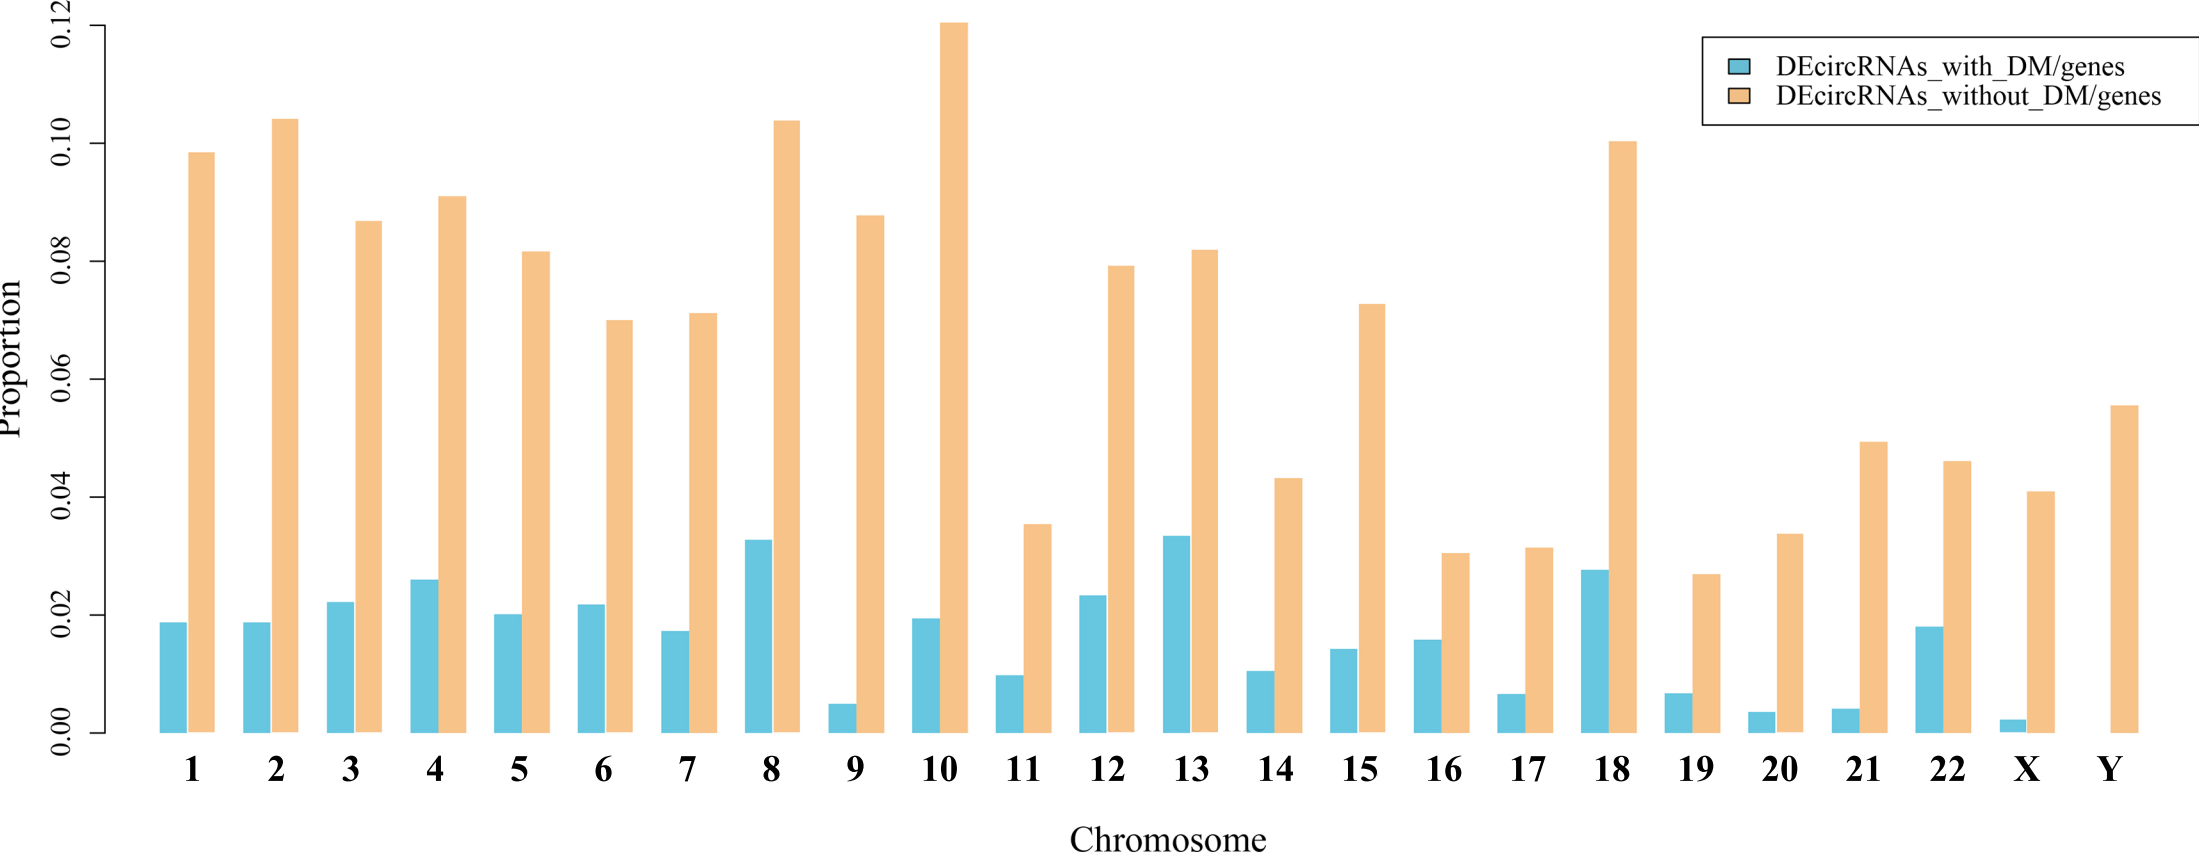

Supplement: s1 [file s1]

# Supplemental Figure S5

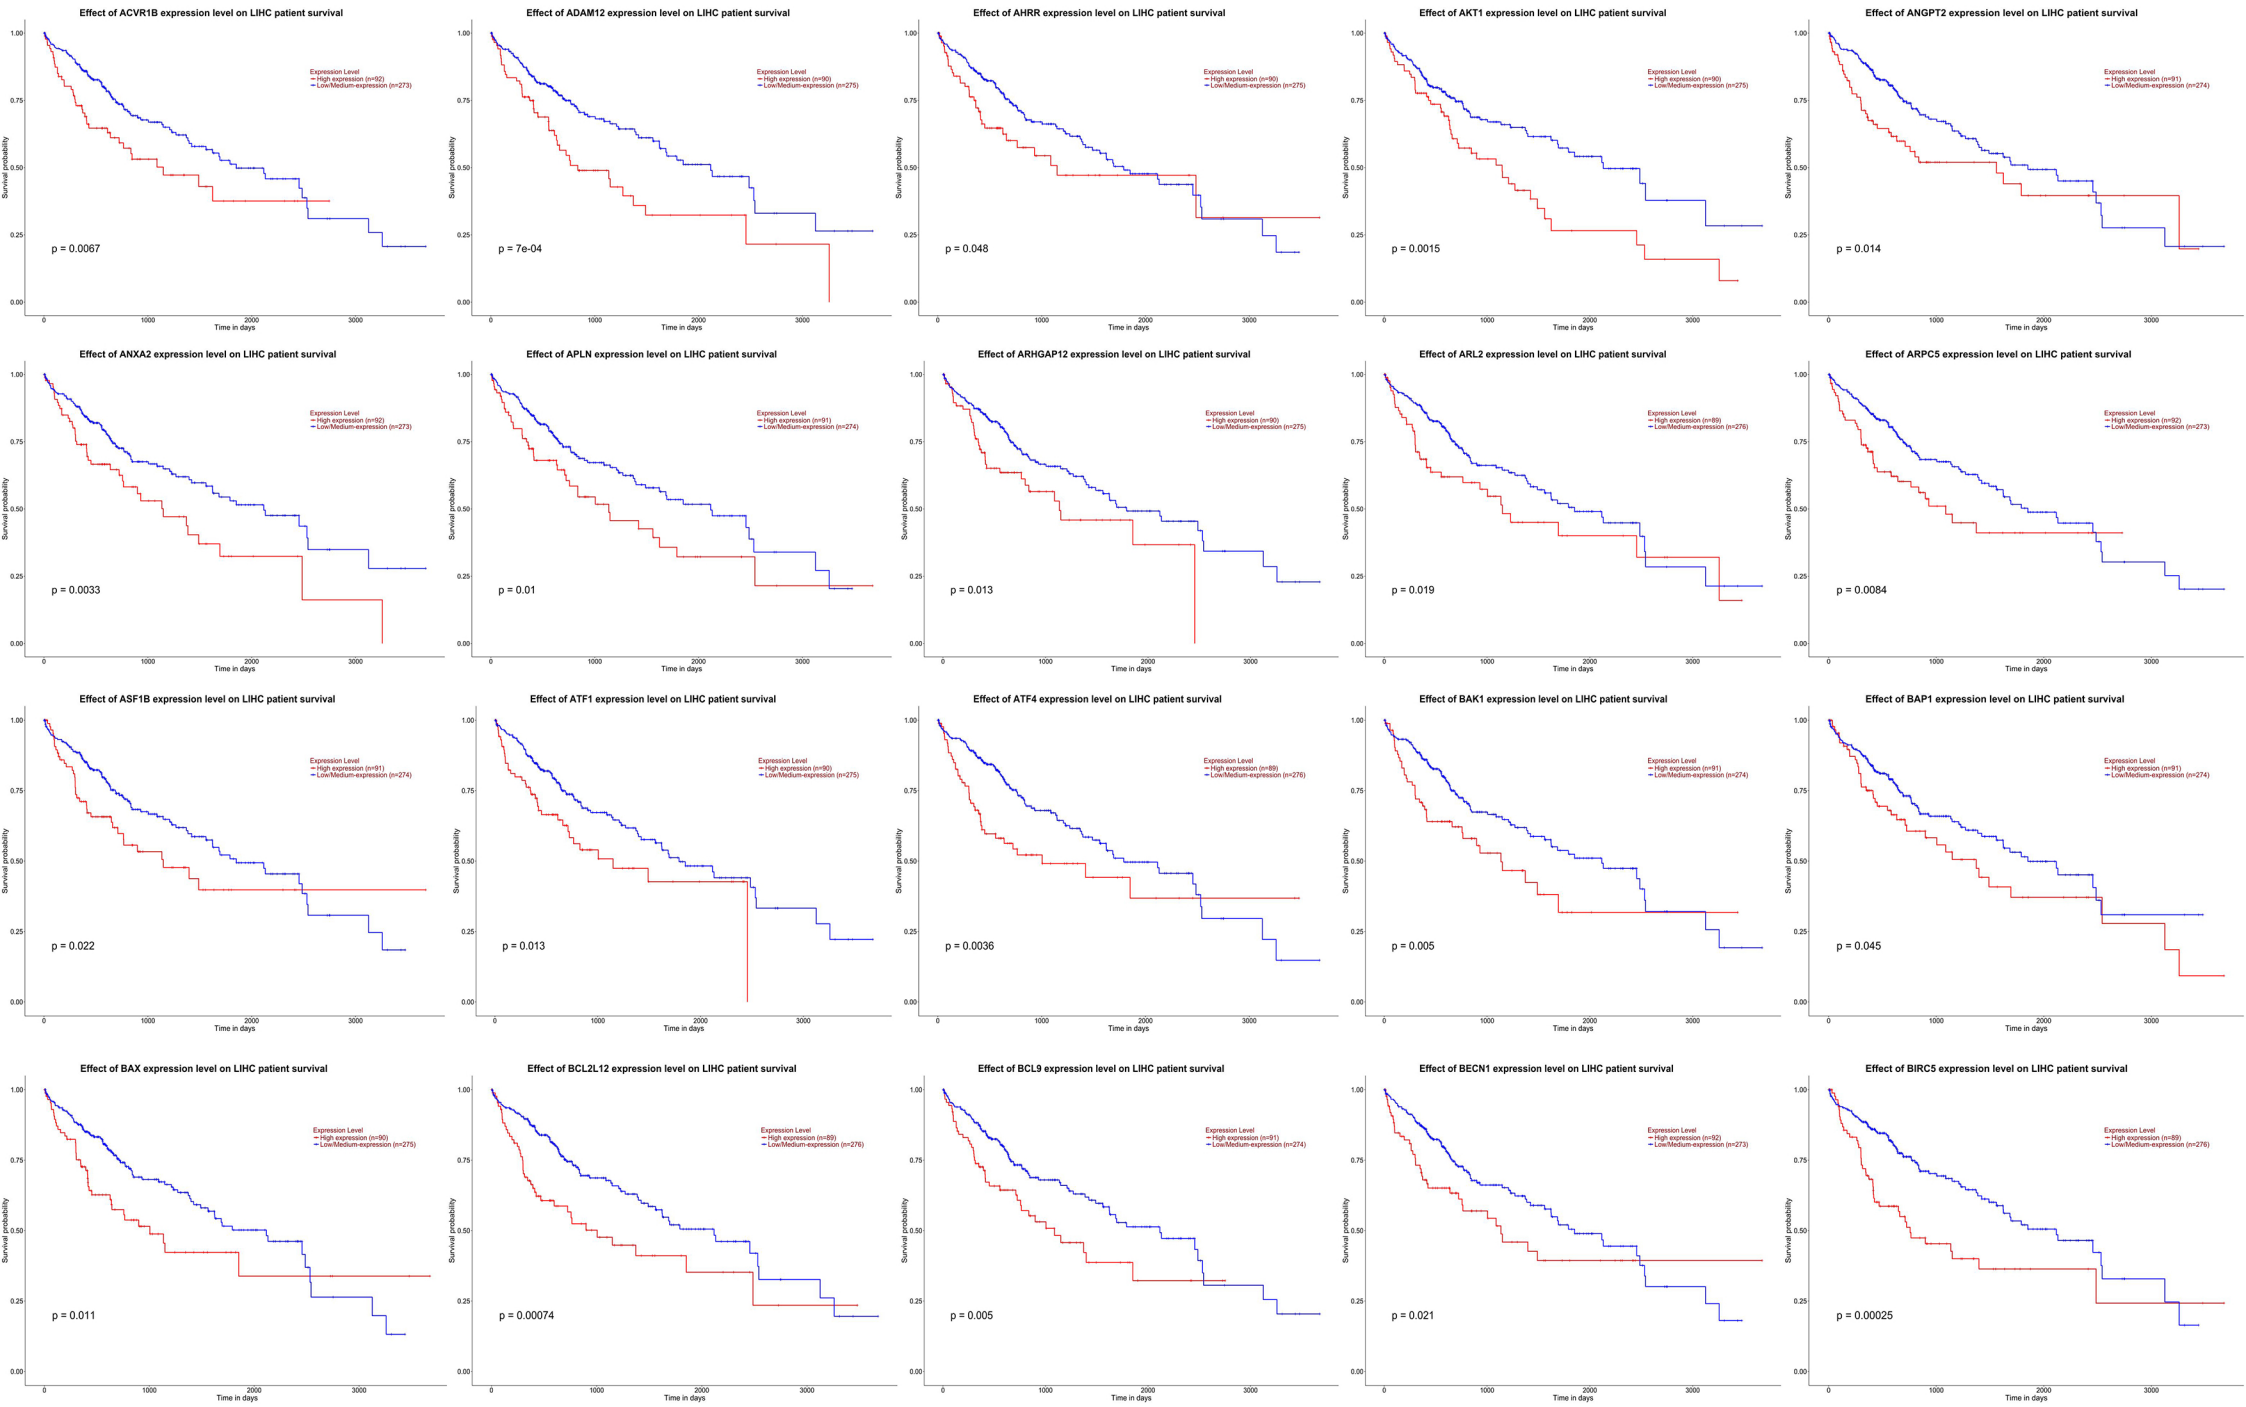

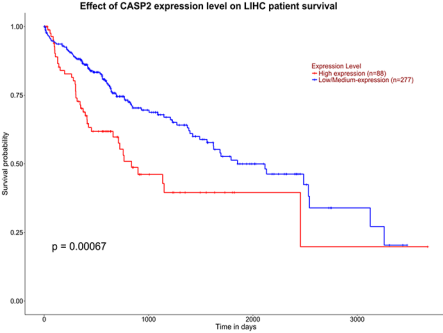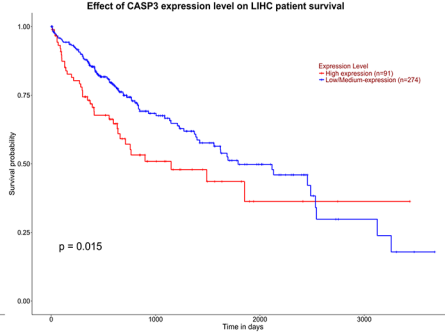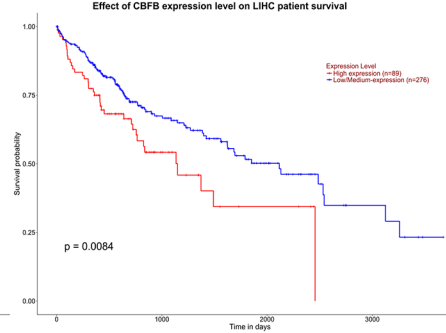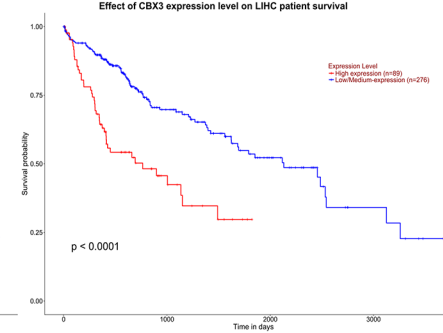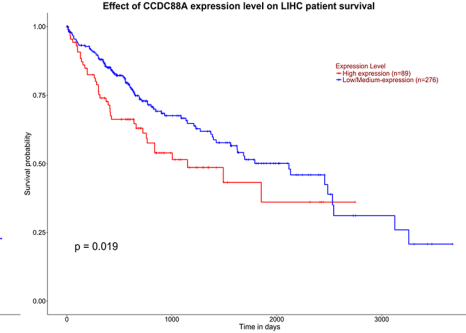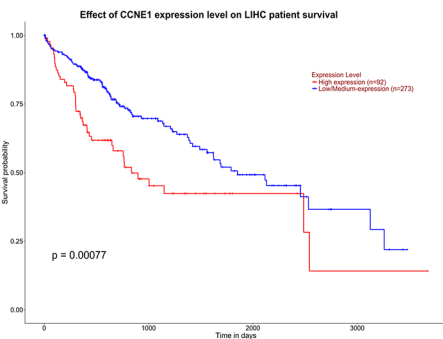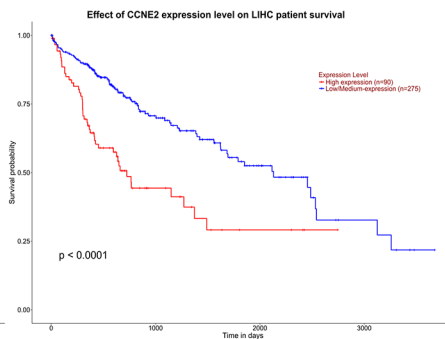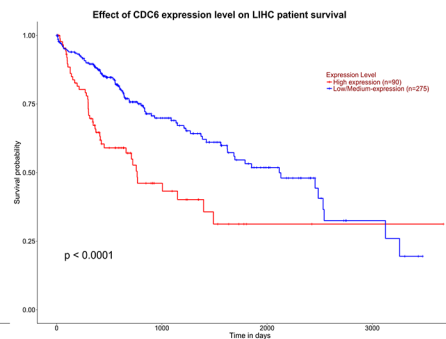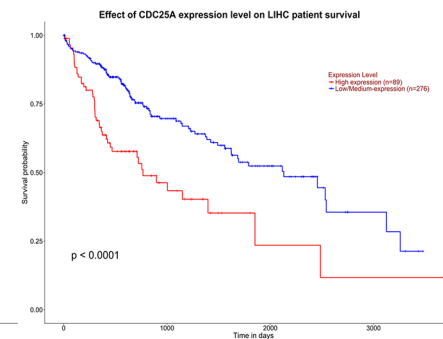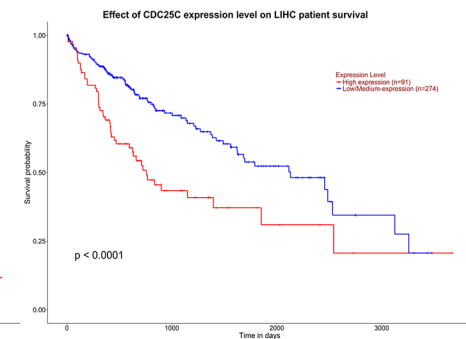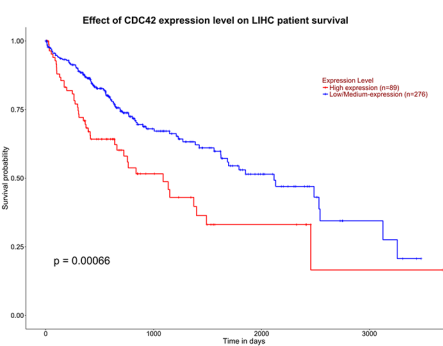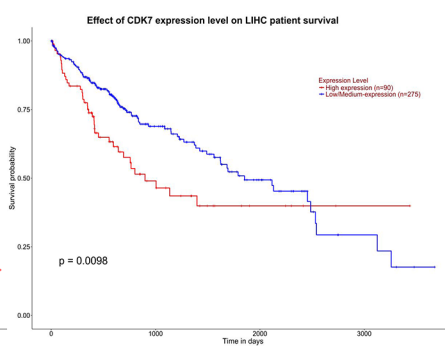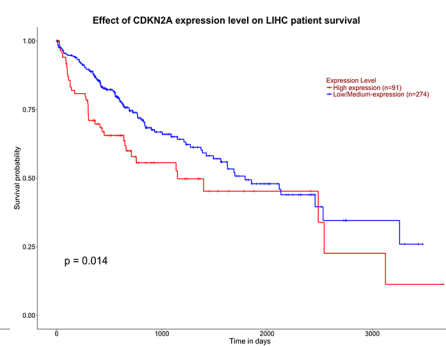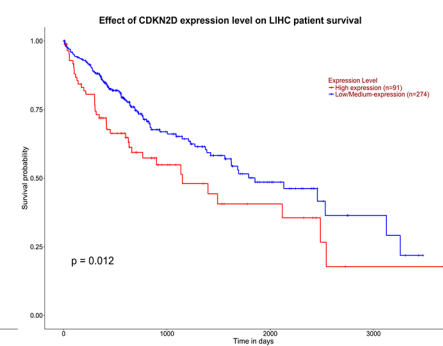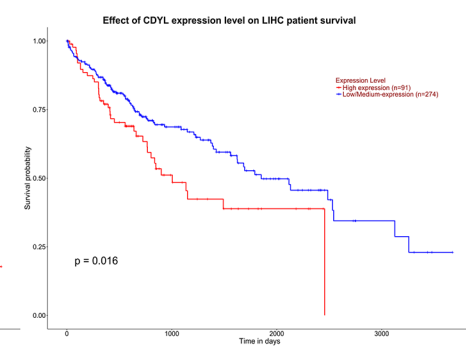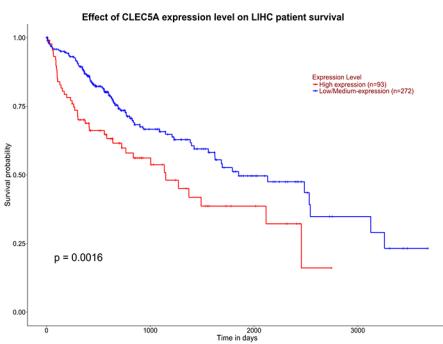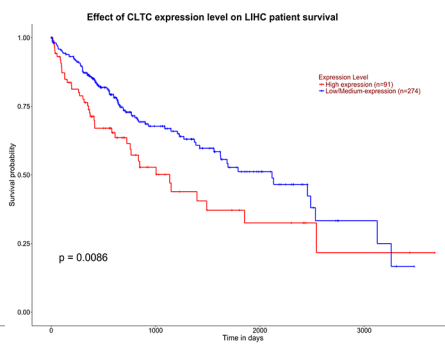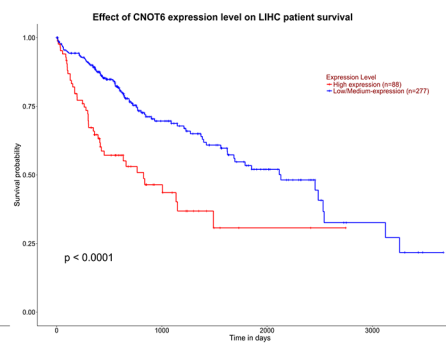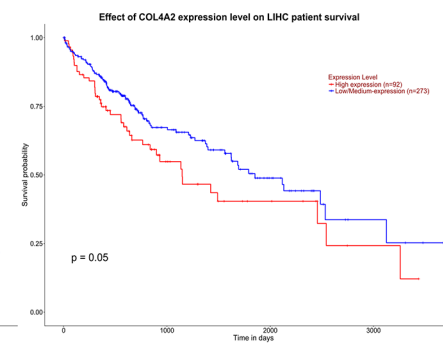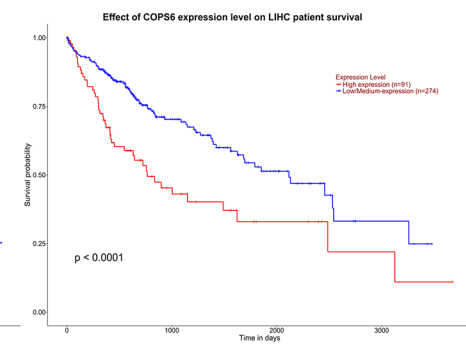

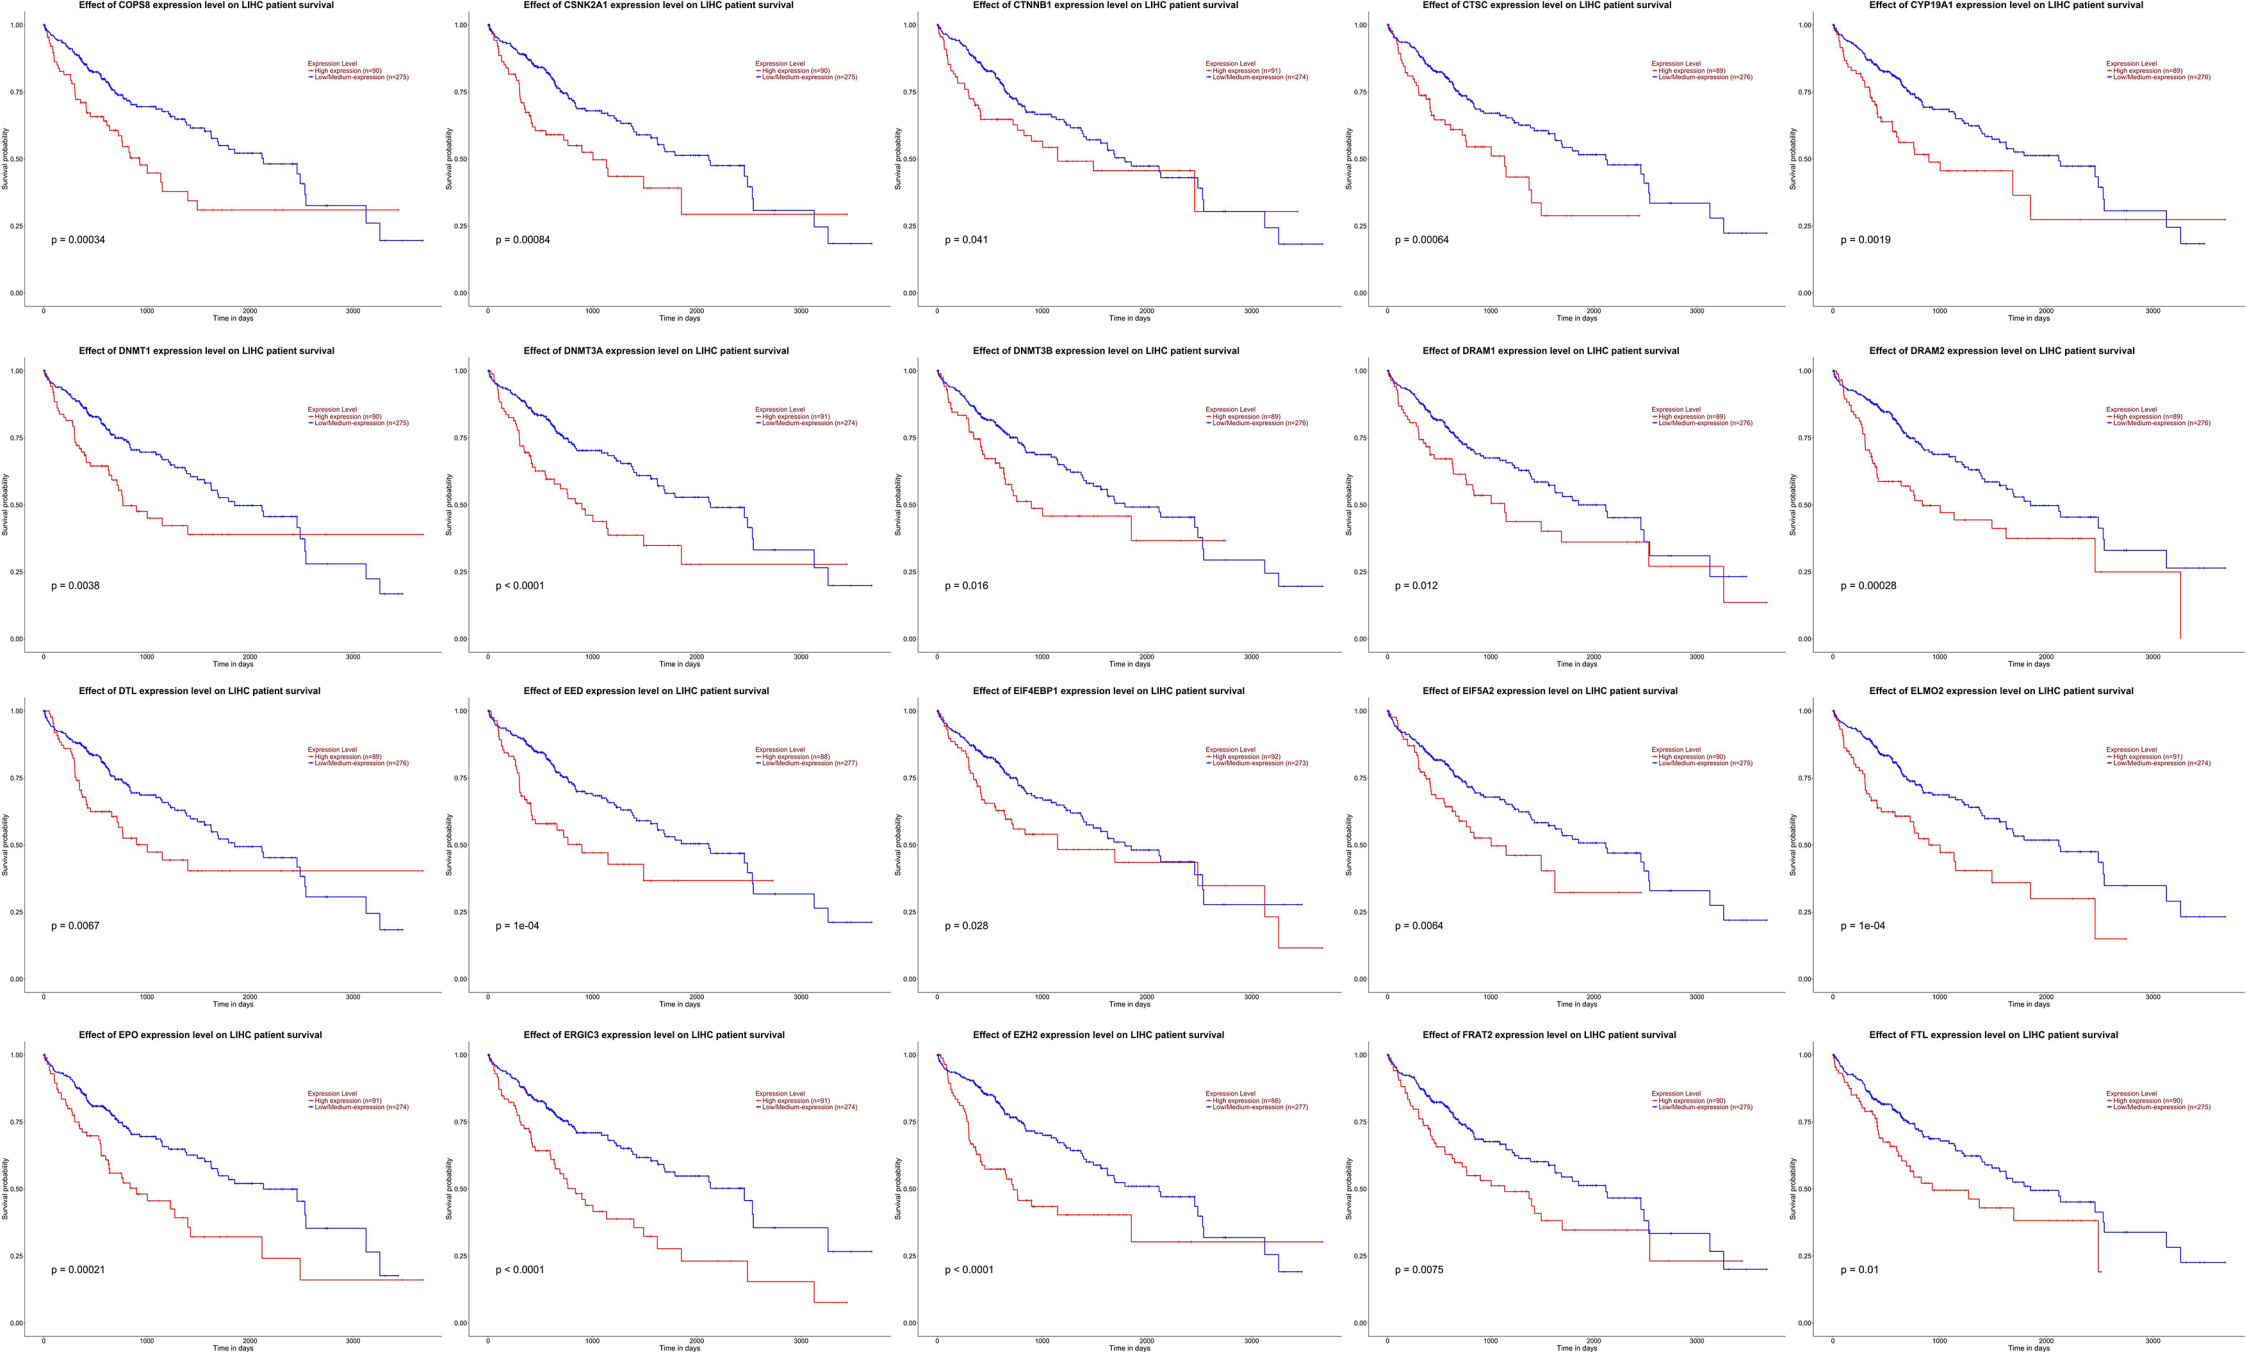

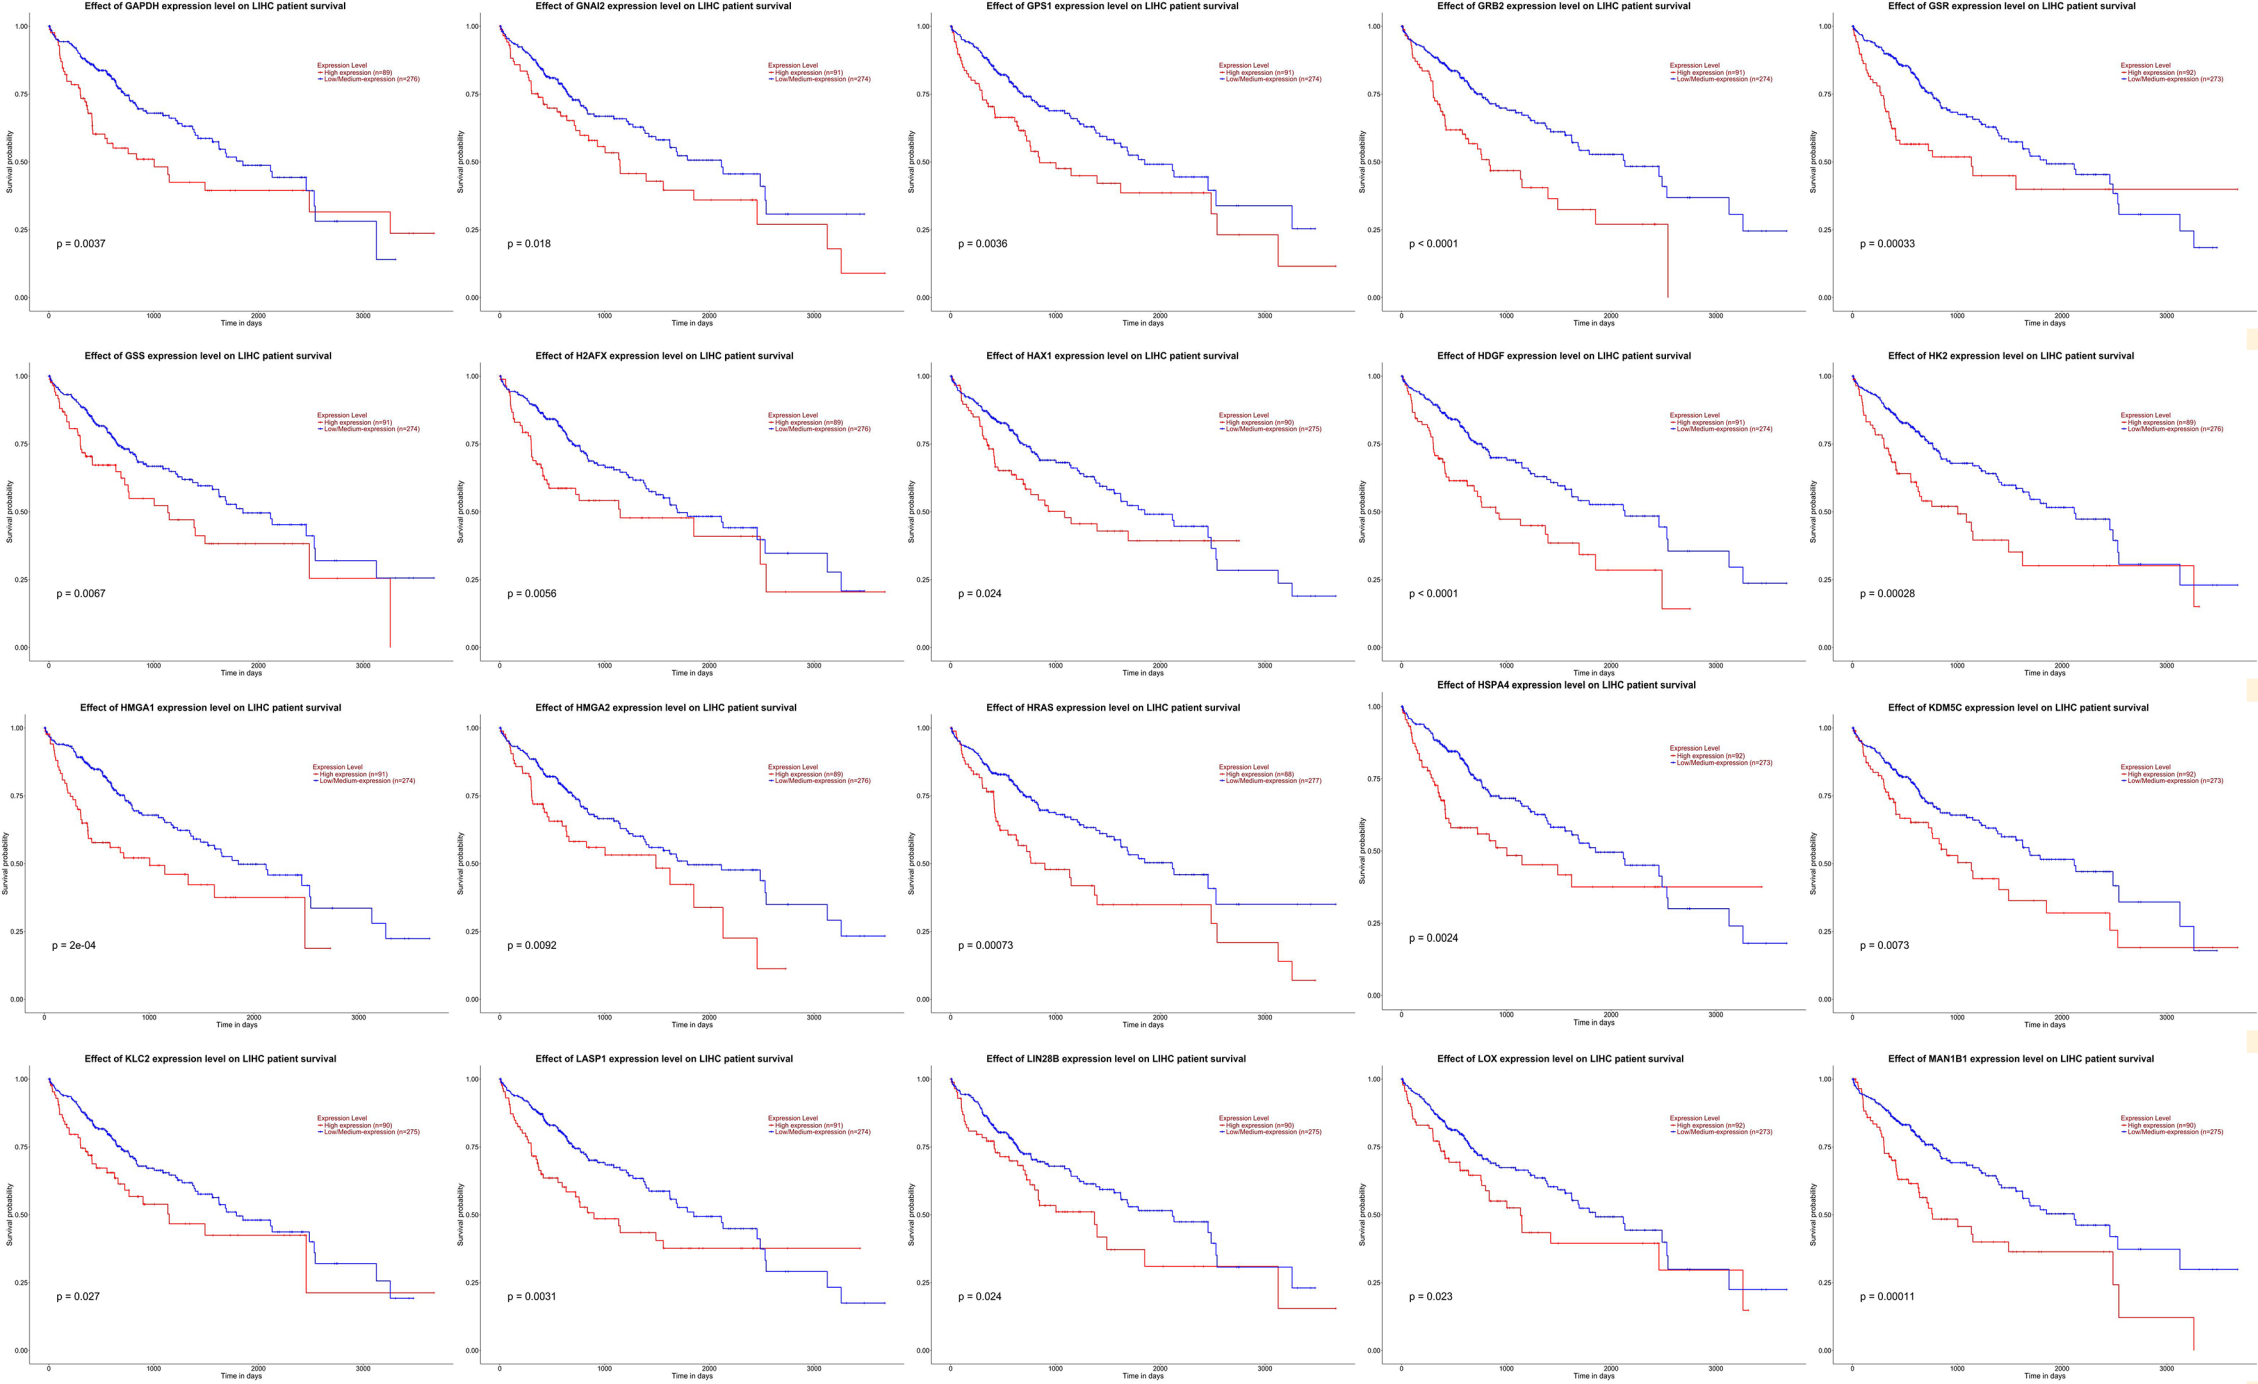



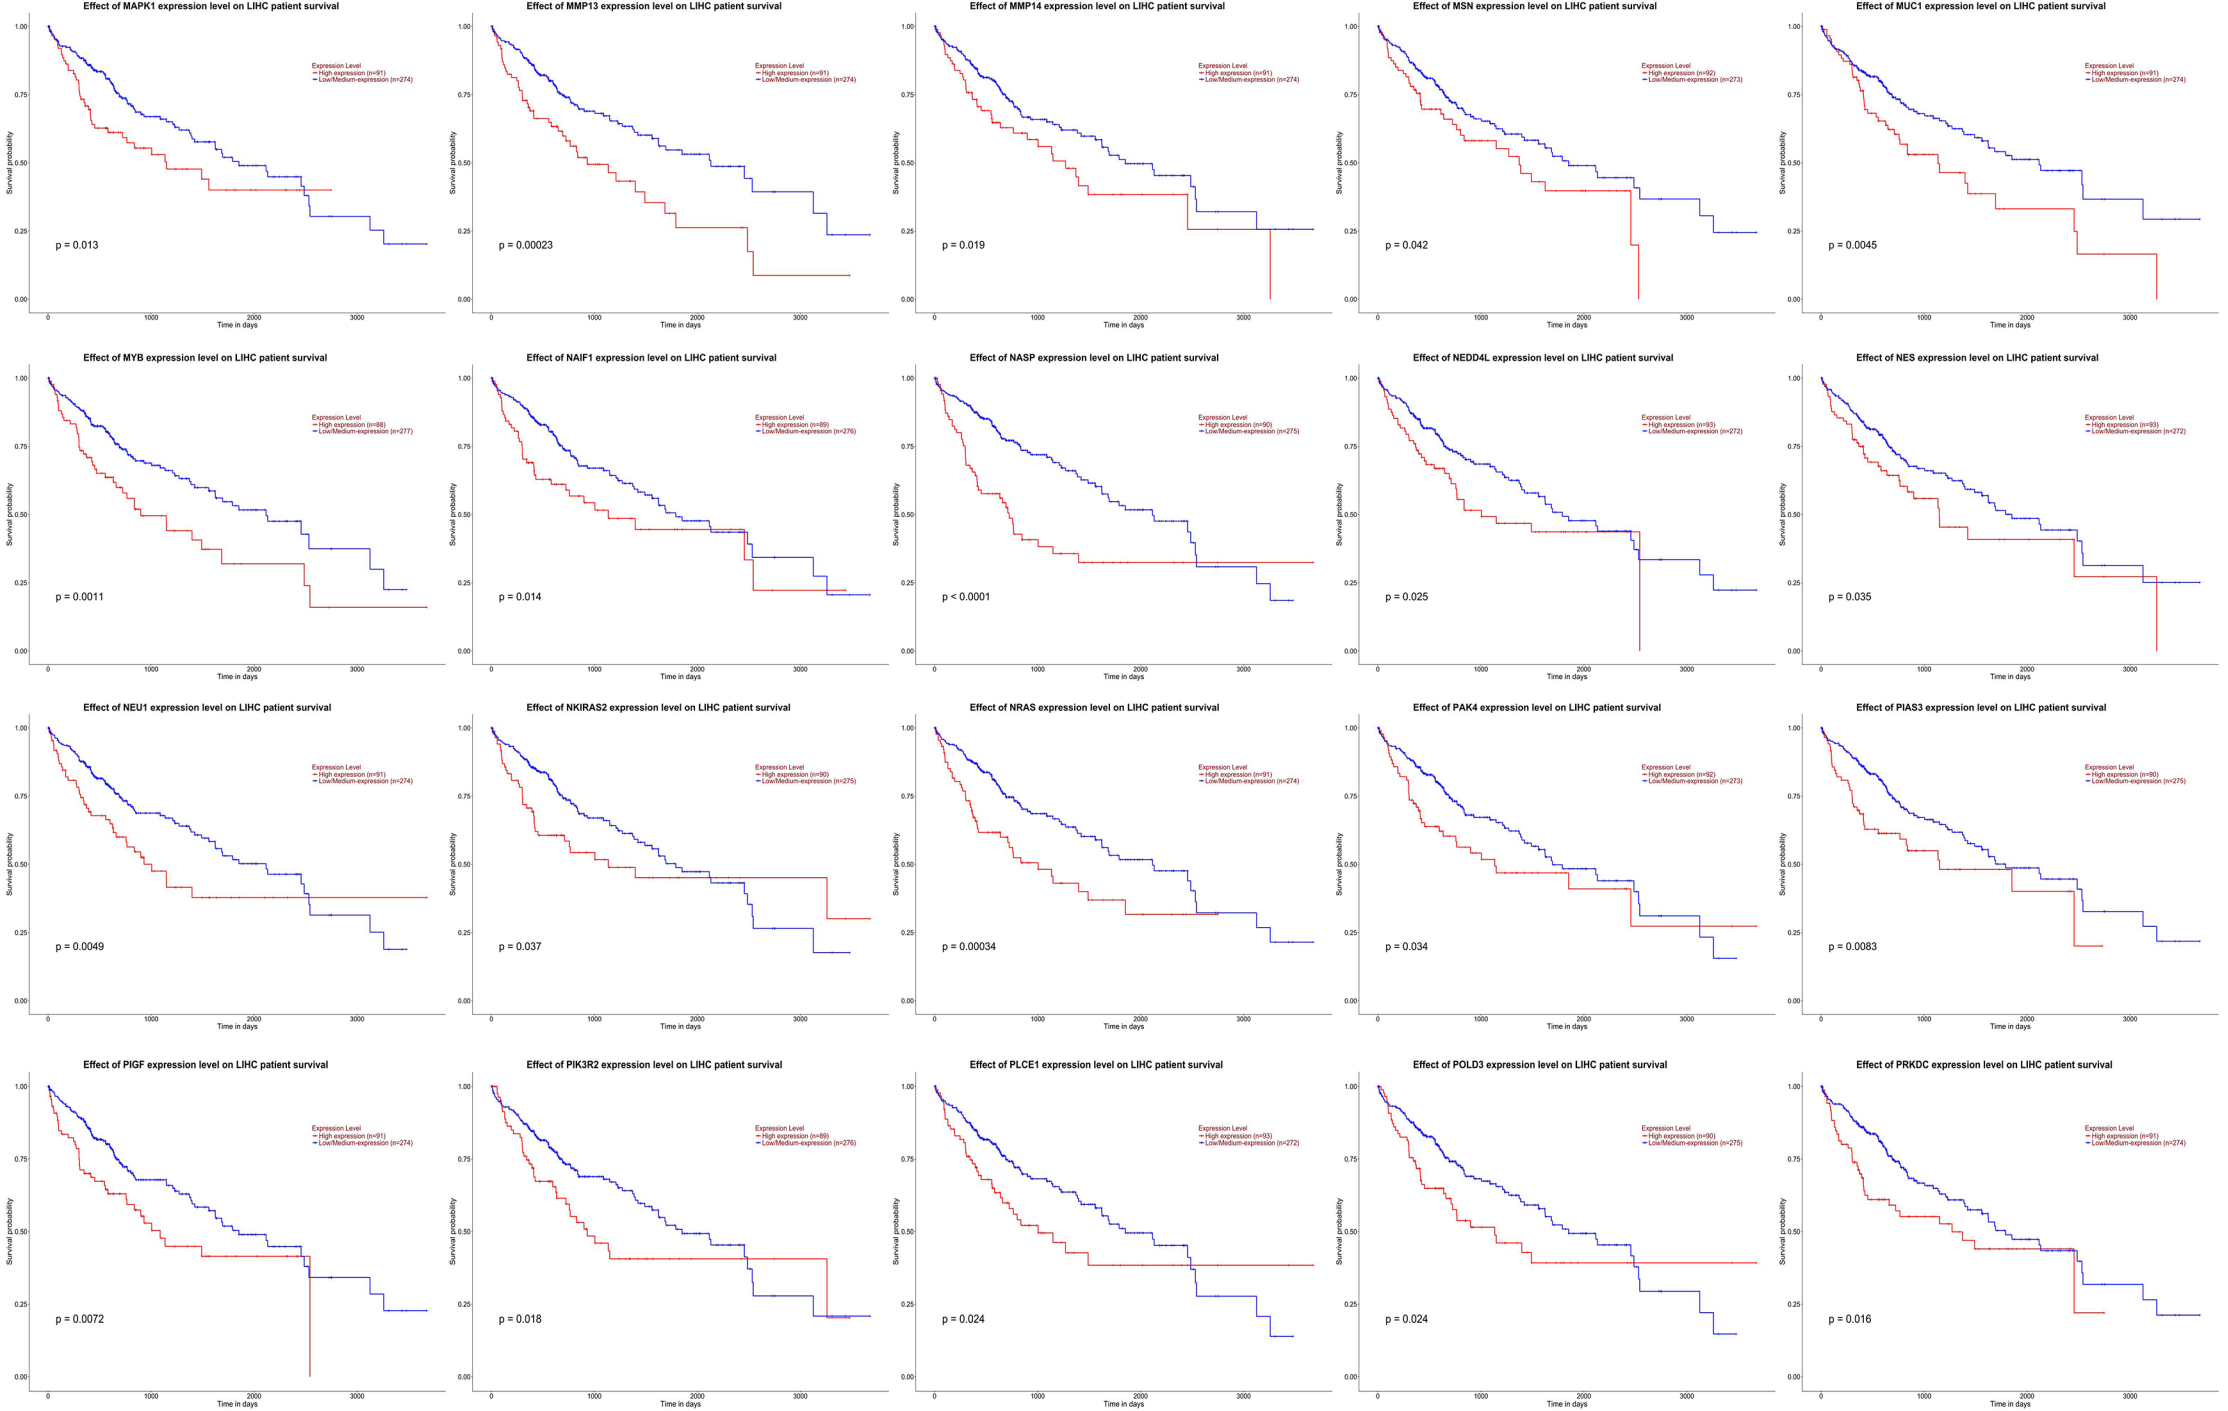

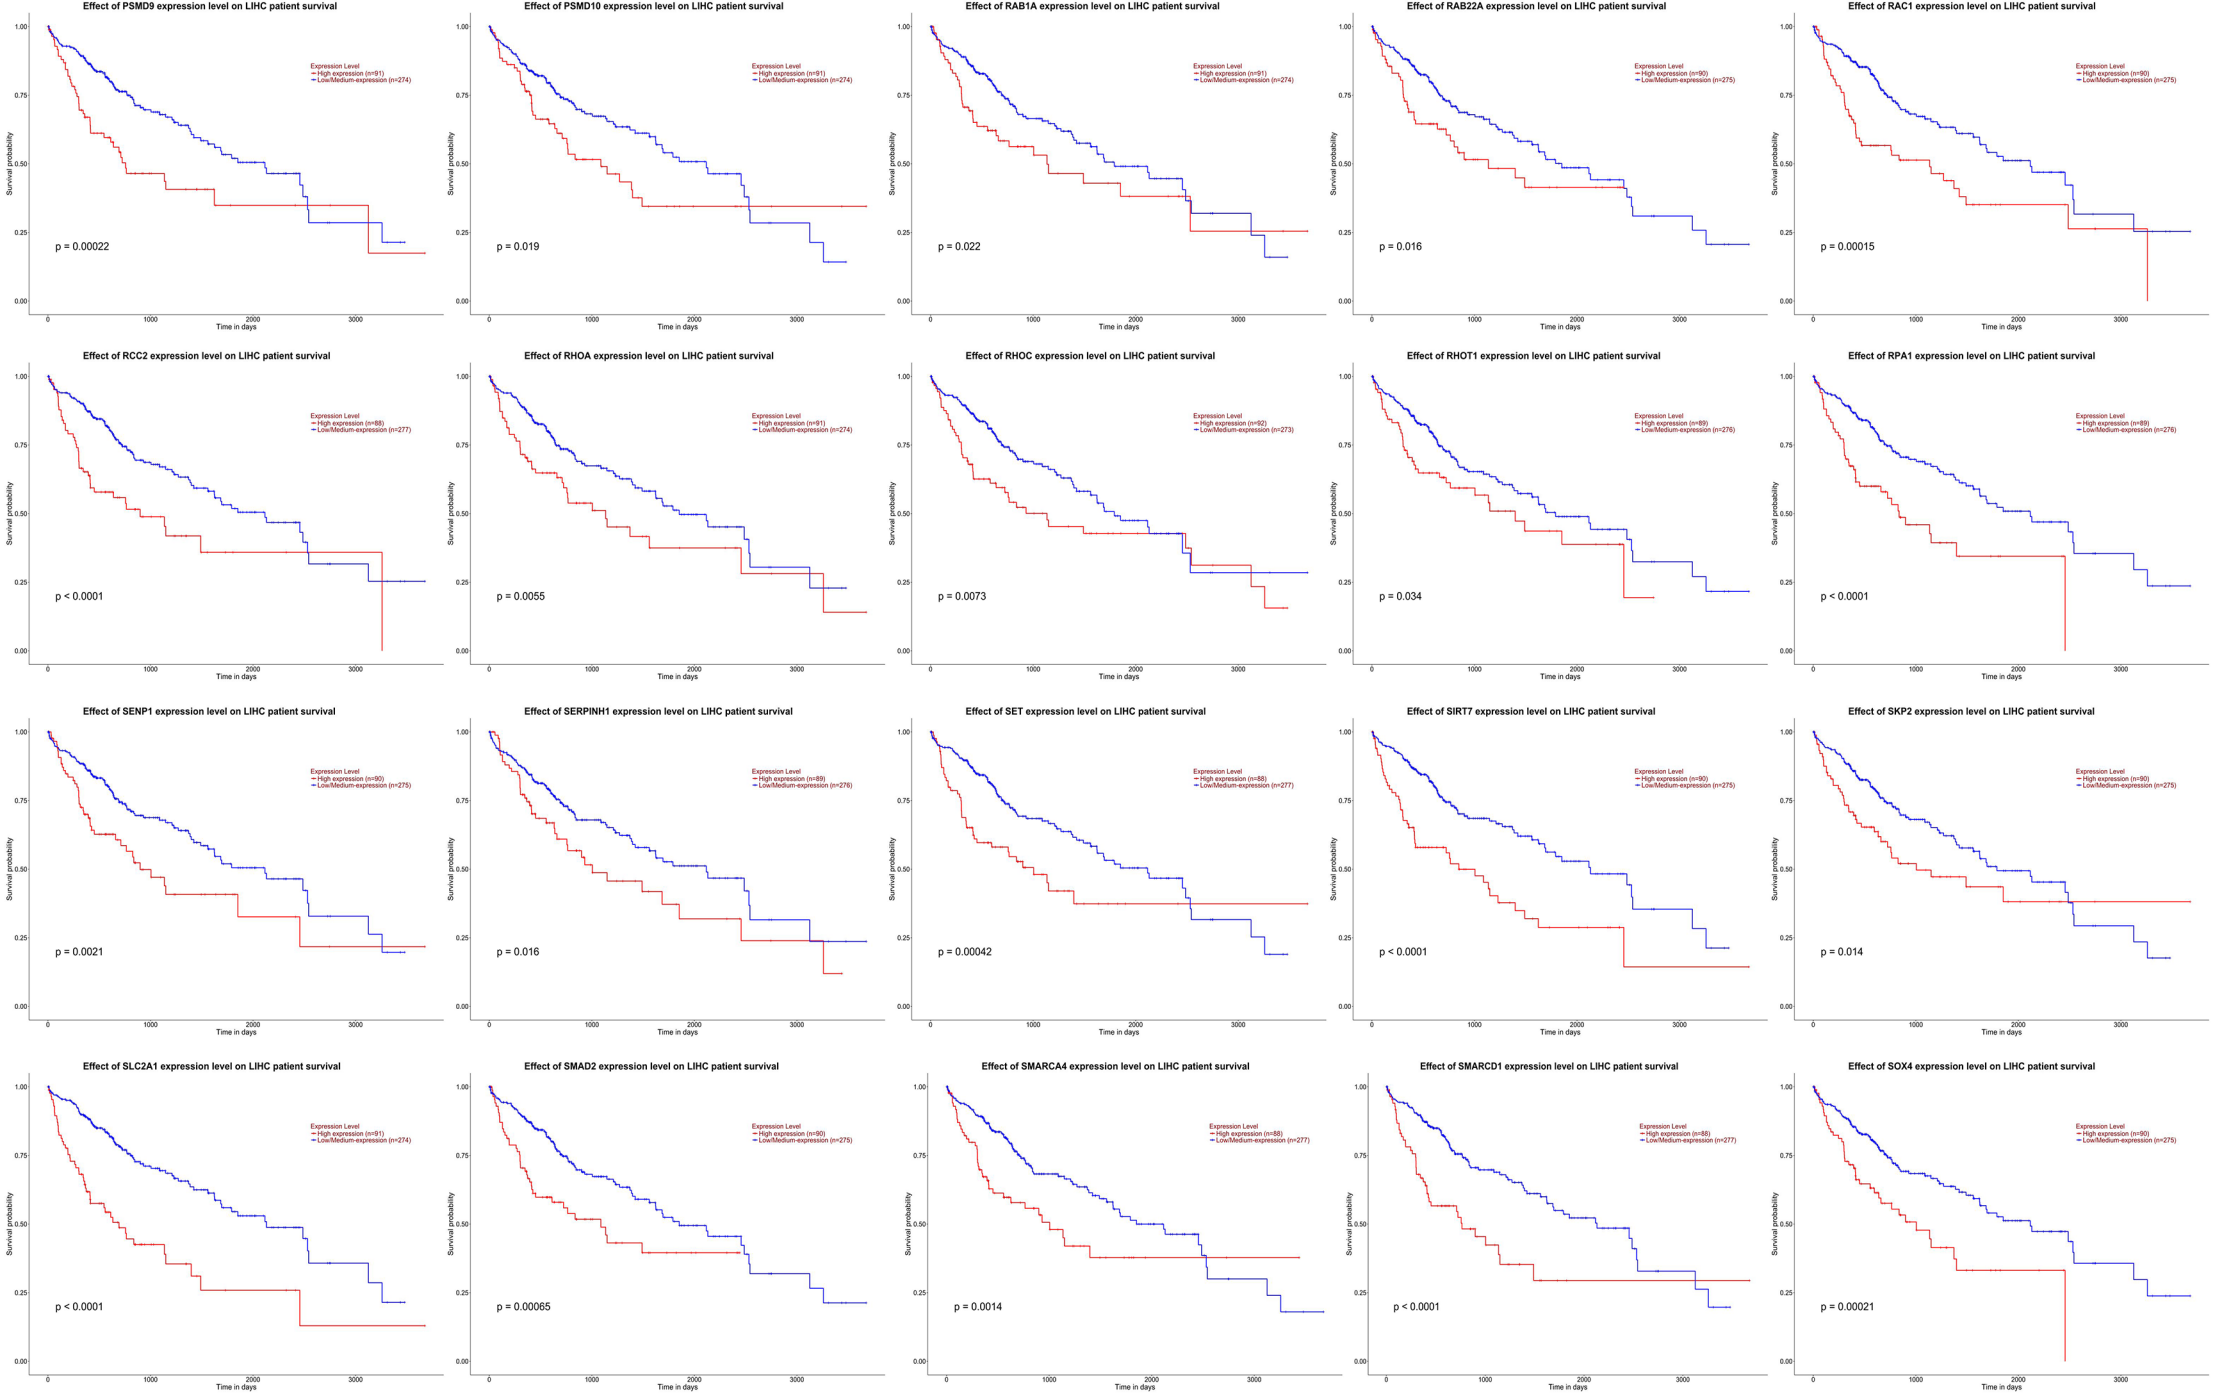

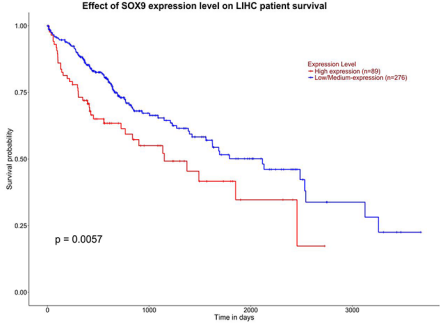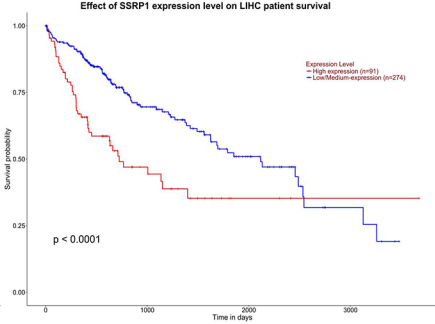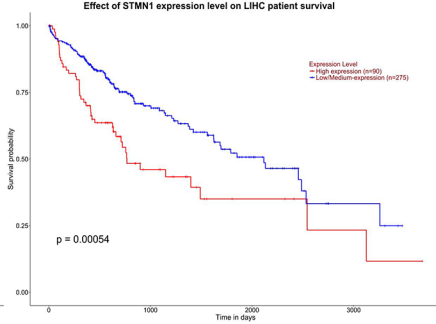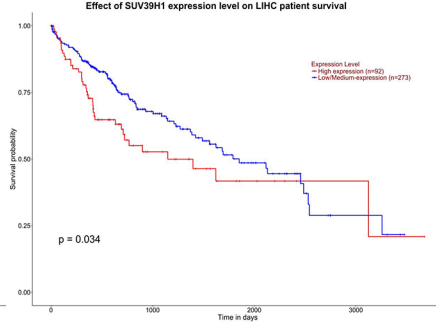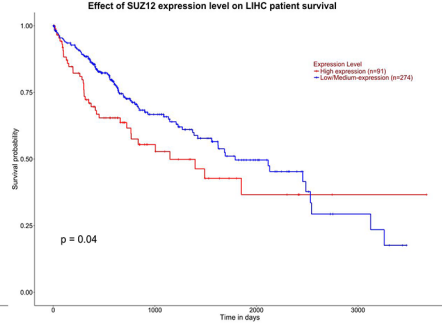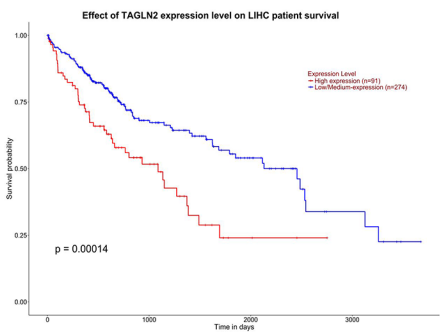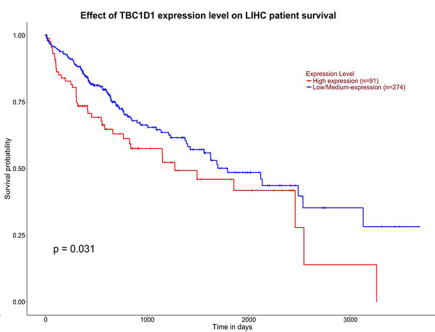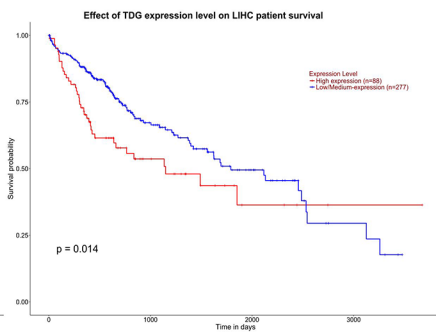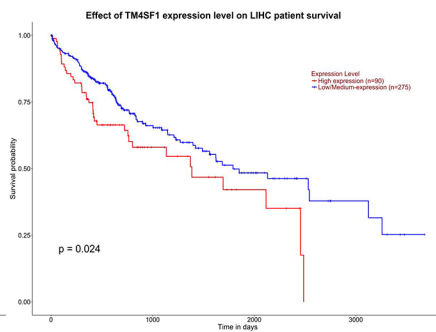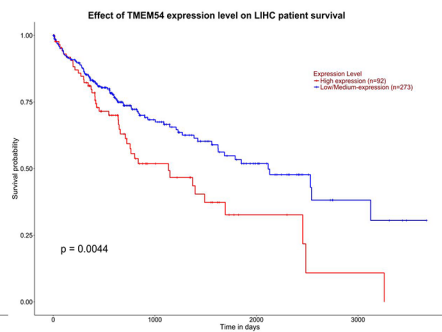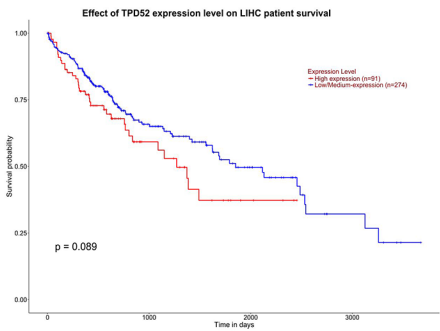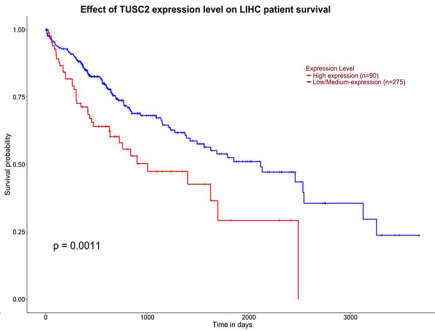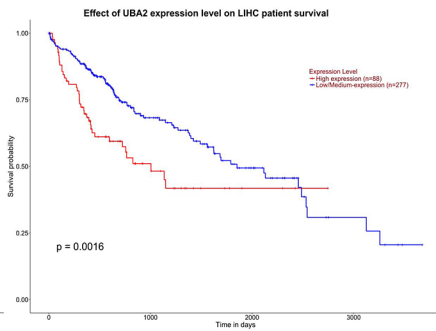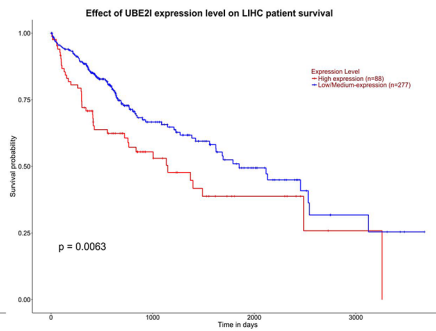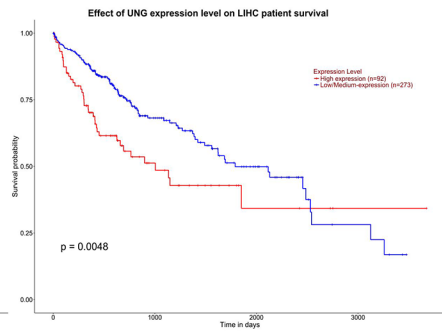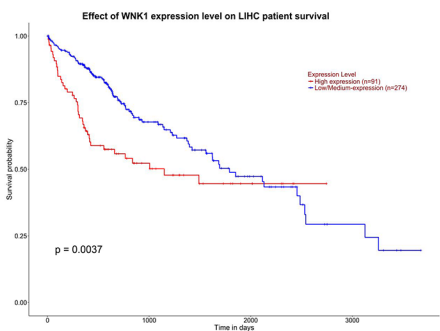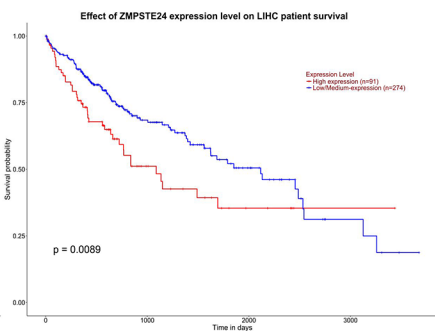

Supplement: s1 [file s1]
